# Supplementary material for: Reduced physiological plasticity in a fish adapted to stable temperatures
Source: PubMed Central journal article supplement — Proc Natl Acad Sci U S A. 2022 May 26;119(22):e2201919119. doi: 10.1073/pnas.2201919119 (PMC9295802; doi:10.1073/pnas.2201919119), 2022-05-26
Supplement: pnas.2201919119.sapp.pdf [file pnas.2201919119.sapp.pdf]

# Proceedings of the National Academy of Sciences

Supplementary Information for the article:

## Reduced physiological plasticity in a fish adapted to stable temperatures

Rachael Morgan<sup>1,2\*</sup>, Anna H. Andreassen<sup>1</sup>, Eirik R. Åsheim<sup>1,3,4</sup>, Mette H. Finnøen<sup>1</sup>, Gunnar Dresler<sup>1</sup>, Tore Brembu<sup>5</sup>, Adrian Loh<sup>6</sup>, Joanna J. Miest<sup>6</sup>, Fredrik Jutfelt<sup>1</sup>

1. Department of Biology, Norwegian University of Science and Technology, 7491 Trondheim, Norway.
2. Department of Biological Sciences, University of Bergen, 5020 Bergen, Norway.
3. Organismal and Evolutionary Research Programme, University of Helsinki, 00014 Helsinki, Finland.
4. Institute of Biotechnology, Helsinki Institute of Life Science (HiLIFE), University of Helsinki, 00014 Helsinki, Finland.
5. Department of Biotechnology and Food Science, Norwegian University of Science and Technology, 7491 Trondheim, Norway.
6. School of Science, University of Greenwich, Chatham Maritime, Kent ME4 4TB, UK.

\* E-mail: rachael.morgan@uib.no

This supplementary information file includes:

Supplementary text

Link to raw data

Figures S1-S8

Tables S1-S7

References

## Supplementary text

### **Estimation of the number of generations AB fish held in lab**

According to the ZFIN website (<https://zfin.org/action/genotype/view/ZDB-GENO-960809-7>), the AB line was brought into the lab in the 1970s. By 1991, the AB fish were 70 generations removed from the AB-wt fish used to establish the line. From this we can assume that 3.4 generations were produced per year (since 21 years = 70 generations). Since we do not have an exact number of generations from then, as each lab has different protocols, we extrapolated these numbers to give us an estimate of the number of generations the AB-wt (lab) fish had been in a laboratory environment at the start of this experiment. Extrapolating from 1991-2017 (26 years  $\times$  3.4 generations) gives 88.4 generations and a total of 158 generations from establishing the line. We therefore used the estimate of over 150 generations in this paper.

## Supplementary Data

Link to all raw data: <https://figshare.com/s/91f03a69303257e477f1>

Supplementary figures

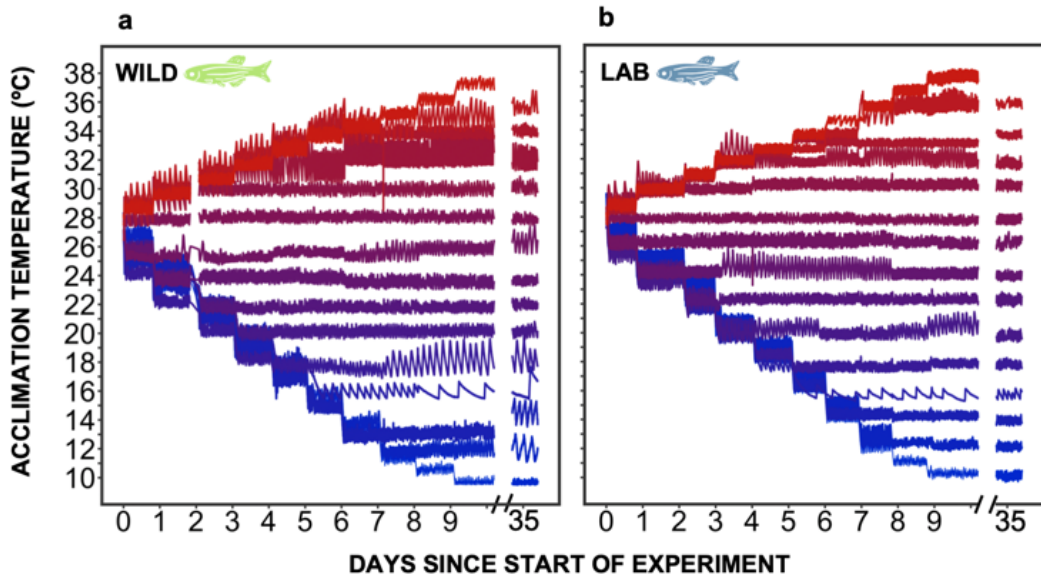

**Figure S1: Thermal profiles** showing the raw traces for how acclimation temperatures (10-38°C; (a) wild fish, 15 aquaria & (b) lab fish, 15 aquaria) were reached and maintained over the entire experimental period (38°C was terminated before the end of the experiment due to high mortality)

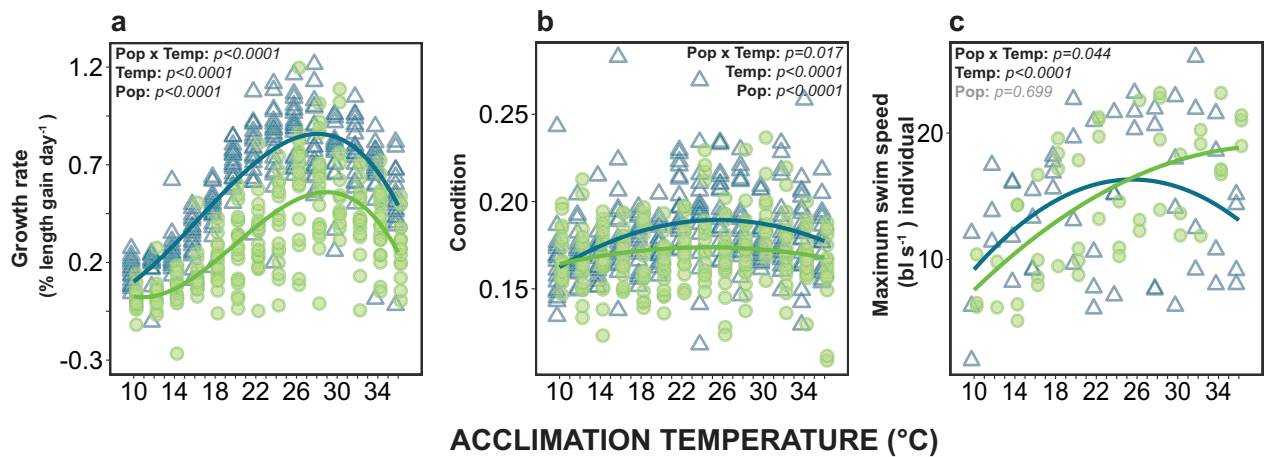

**Figure S2: Growth (length), condition and maximum swim speed (individuals) of lab and wild fish acclimated from 10-36(38)°C.** b - Specific growth rate for length for each individual fish. c - Condition of fish after 35 days of acclimation (calculated as the Fulton's condition index). d - Maximum swim speed of individual fish measured in a swim respirometer. (see Table S4 & S6)

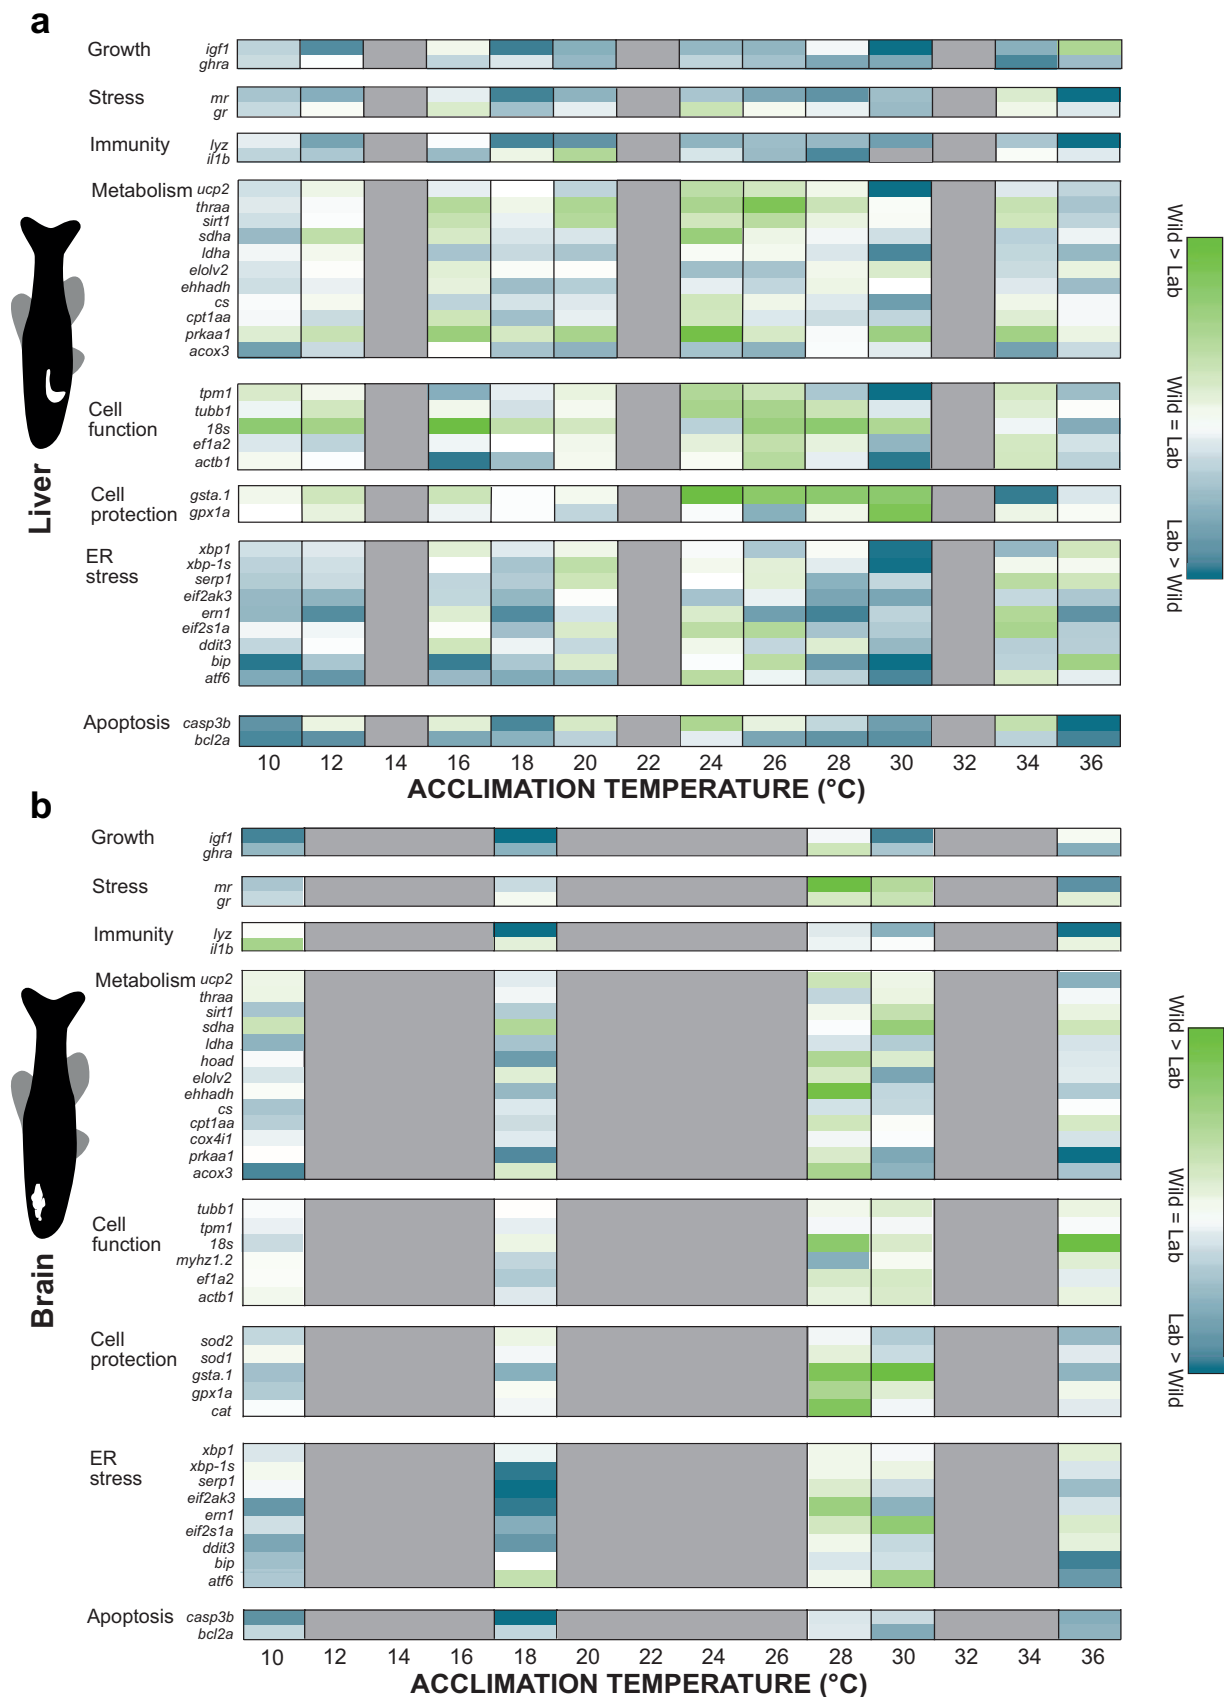

**Figure S3: Heat map showing the difference in liver (a) and brain (b) gene expression between wild and lab fish.** If there are no differences between wild and lab fish then the colour is white, this then proceeds along a colour gradient with the strongest green showing a higher expression in wild fish and the darkest blue a higher expression in lab fish. Genes are grouped according to their function and colours represent relative expression within these groups. Fish were only sampled at 10, 18, 28, 30 & 36°C in the brain and at 10, 12, 16, 18, 20, 24, 26, 28, 30, 34, and 36°C in the liver.

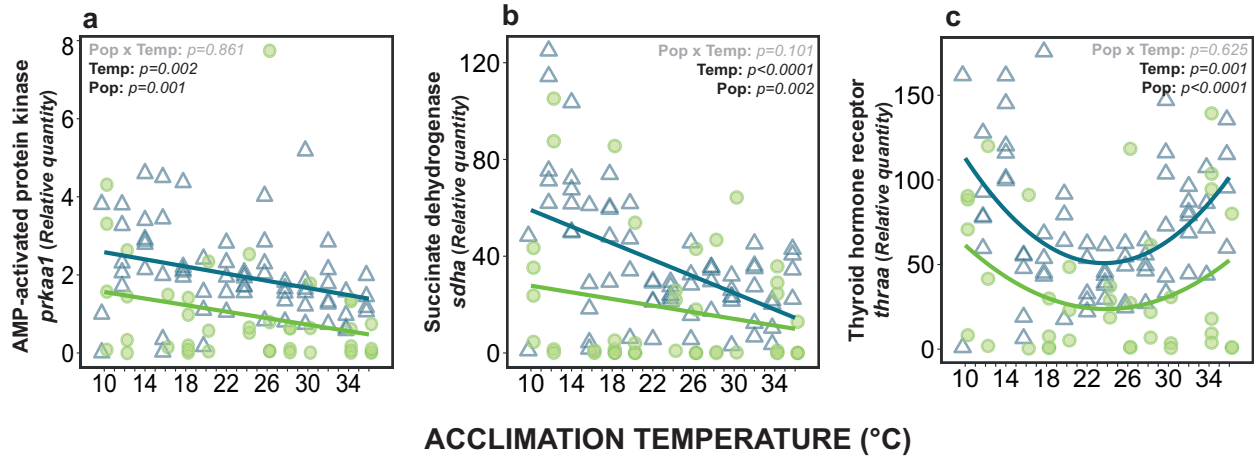

**Figure S4: Metabolic gene expression using qPCR in wild and lab zebrafish acclimated from 10-36°C.** a - Relative quantity of AMP-activated protein kinase subunit alpha-1 (*prkaa1*); b - Relative quantity of succinate dehydrogenase subunit A (*sdha*); c - Relative quantity of thyroid hormone receptor alpha-A (*thraa*). Wild fish are illustrated by green circles and lab fish by blue triangles.

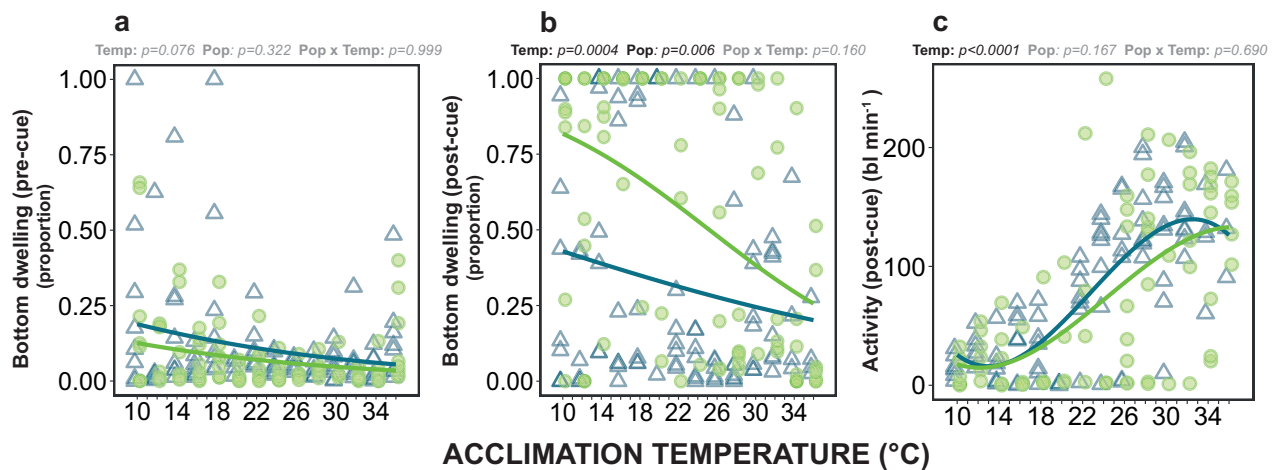

**Figure S5: Behaviours corresponding to Fig. 2e & f, pre (a) and post (b) alarm cue time spent bottom dwelling and post-cue activity (c) in lab and wild zebrafish acclimated from 10-36°C.** Wild fish: green circles, lab fish: blue circles. Statistically significant differences indicated on each panel: Temp – significant effect of temperature on trait, Pop – significant difference between wild and lab fish (at 23°C), Pop x Temp – significant interaction (see Table S4-S6)

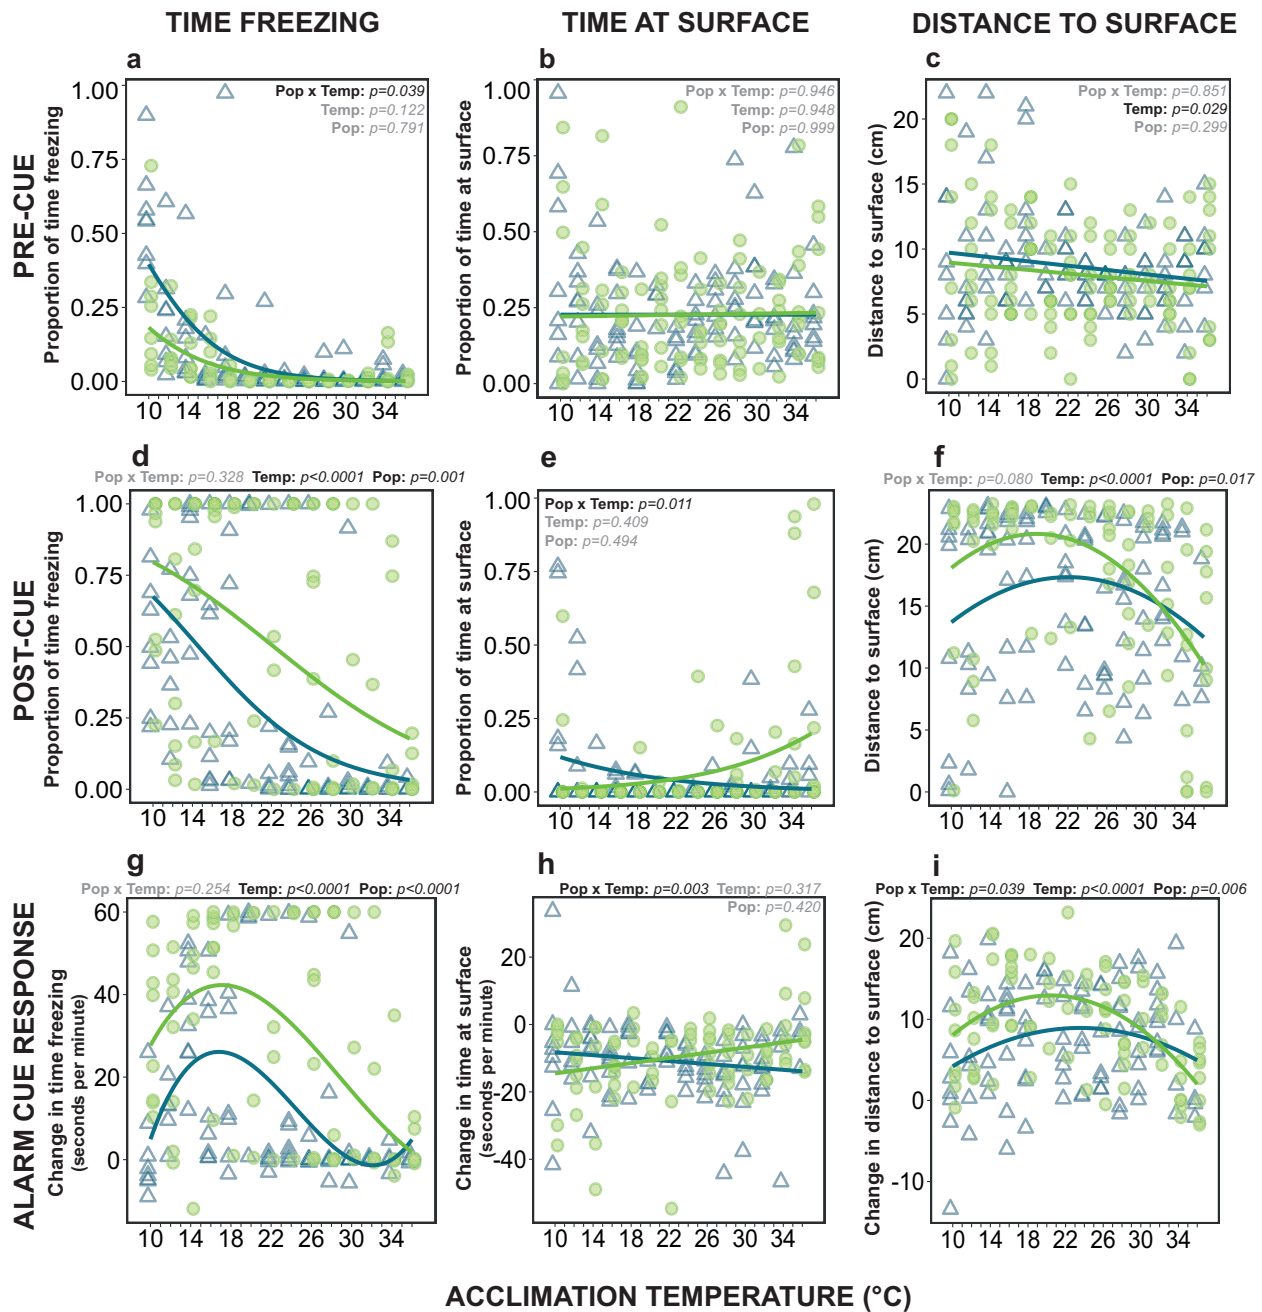

**Figure S6: Additional behaviours: time spent freezing, time at the surface, and distance from the surface, in lab and wild zebrafish acclimated from 10-36°C.** All behaviours were analysed pre-alarm cue (baseline) and post-alarm cue. The alarm cue response was quantified as the change in behaviour. Wild fish: green circles, lab fish: blue circles. Statistically significant differences indicated on each panel: Temp – significant effect of temperature on trait, Pop – significant difference between wild and lab fish (at 23°C), Pop x Temp – significant interaction (see Table S4-S6)

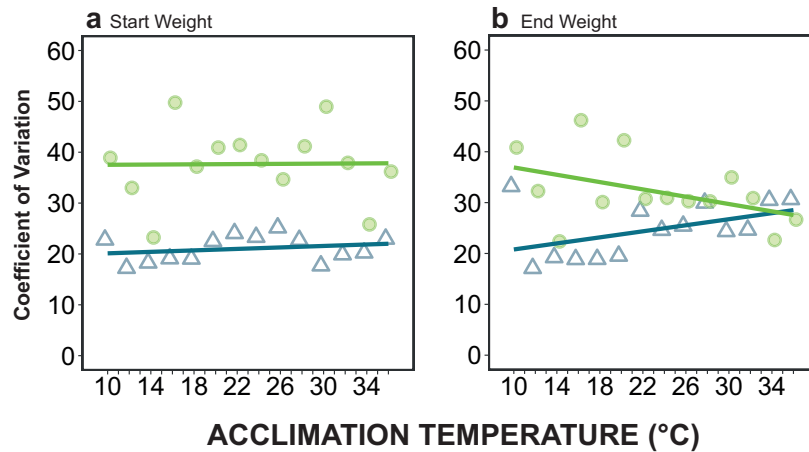

**Figure S7: Coefficient of variation for weight of the fish at the (a) start and (b) end of the experiment.** During phenotyping not all individuals from each tank were measured but the measured ones were assumed to be representative for that temperature. The coefficient of variation in weight at the start and end of the experiment shows how much variation there was at each temperature and how representative the measured individuals are. At the start of the experiment the two populations (wild: green circles; lab: blue triangles) show consistent variation within population but overall there is less variation in the lab than wild. By the end of the experiment the variation at the colder temperatures was similar as the start but at the warmer temperatures both wild and lab fish had converged and show similar variation.

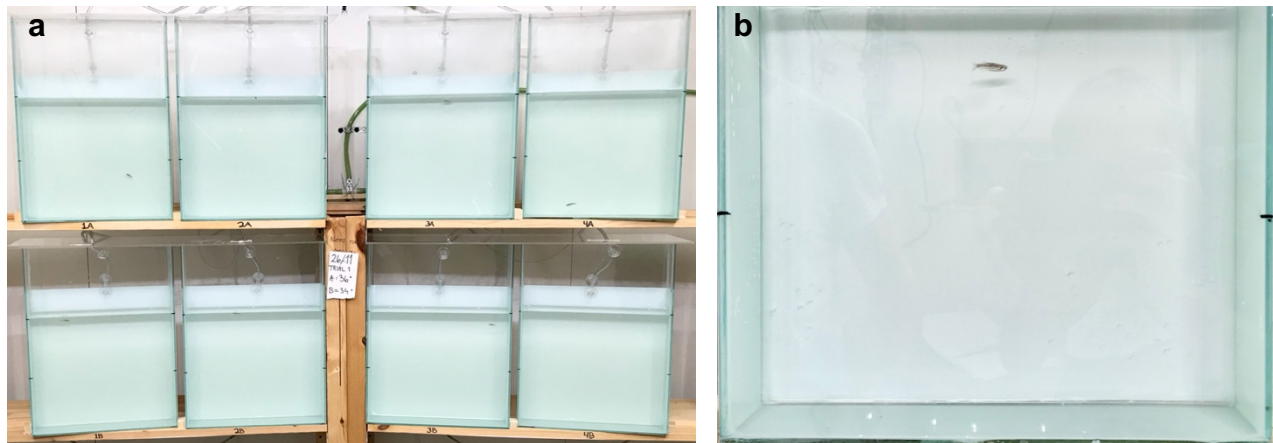

**Figure S8: Design of the behavioural arena.** The behavioural tests were conducted in eight parallel arenas (a) with one fish in each (b). The tanks had white back and sides, and clear front where the video recording was taken from. A pipette tip introduced chemical cues at the centre top of the arenas.

## Supplementary Tables

**Table S1:** Statistical output from ANOVA's comparing whether acclimation temperature (T), population (P; wild or lab) and the interaction between them (TxP) differs in a range of traits.

|                           | Temperature<br>(T)      |         | Population<br>(P)       |         | Interaction<br>(T x P)  |         | Weight<br>(W)          |         |
|---------------------------|-------------------------|---------|-------------------------|---------|-------------------------|---------|------------------------|---------|
|                           | F-value <sup>df</sup>   | p-value | F-value <sup>df</sup>   | p-value | F-value <sup>df</sup>   | p-value | F-value <sup>df</sup>  | p-value |
| <b>Behaviour</b>          |                         |         |                         |         |                         |         |                        |         |
| Activity                  | 74.77 <sup>3,193</sup>  | <0.0001 | 77.52 <sup>1,193</sup>  | <0.0001 | 3.75 <sup>3,193</sup>   | 0.012   | -                      | -       |
| Change in activity        | 7.71 <sup>2,163</sup>   | 0.0006  | 42.20 <sup>1,163</sup>  | <0.0001 | 3.54 <sup>2,163</sup>   | 0.031   | -                      | -       |
| Change in bottom-dwelling | 13.18 <sup>2,175</sup>  | <0.0001 | 28.38 <sup>1,175</sup>  | <0.0001 | 3.43 <sup>2,175</sup>   | 0.034   | -                      | -       |
| <b>Physiology</b>         |                         |         |                         |         |                         |         |                        |         |
| Response time             | 42.16 <sup>2,97</sup>   | <0.0001 | 1.07 <sup>1,97</sup>    | 0.303   | 3.82 <sup>2,97</sup>    | 0.025   | -                      | -       |
| Max swim speed            | 109.34 <sup>3,74</sup>  | <0.0001 | 6.21 <sup>1,74</sup>    | 0.015   | 1.64 <sup>3,74</sup>    | 0.187   | -                      | -       |
| Thermal tolerance         | 3559.9 <sup>2,212</sup> | <0.0001 | 34.89 <sup>1,212</sup>  | <0.0001 | 11.88 <sup>2,212</sup>  | <0.0001 | 10.82 <sup>1,212</sup> | 0.0012  |
| SMR                       | 57.46 <sup>2,69</sup>   | <0.0001 | 2.93 <sup>1,69</sup>    | 0.091   | 3.18 <sup>2,69</sup>    | 0.048   | 6.04 <sup>1,69</sup>   | 0.017   |
| MMR                       | 78.61 <sup>3,72</sup>   | <0.0001 | 20.19 <sup>1,72</sup>   | <0.0001 | 3.80 <sup>3,72</sup>    | 0.014   | -                      | -       |
| Aerobic scope             | 32.47 <sup>3,17</sup>   | <0.0001 | 17.64 <sup>1,17</sup>   | 0.0006  | 1.149 <sup>3,17</sup>   | 0.358   | -                      | -       |
| Growth rate               | 197.69 <sup>3,522</sup> | <0.0001 | 277.74 <sup>1,522</sup> | <0.0001 | 4.68 <sup>3,522</sup>   | 0.003   | -                      | -       |
| <b>Cellular</b>           |                         |         |                         |         |                         |         |                        |         |
| RBC size                  | 23.33 <sup>2,108</sup>  | <0.0001 | 0.005 <sup>1,108</sup>  | 0.944   | 1.35 <sup>1,108</sup>   | 0.264   | -                      | -       |
| RNA:DNA                   | 0.07 <sup>1,128</sup>   | 0.790   | 3.55 <sup>1,128</sup>   | 0.062   | 0.60 <sup>1,128</sup>   | 0.440   | -                      | -       |
| <b>Genes</b>              |                         |         |                         |         |                         |         |                        |         |
| <i>ghra</i> muscle        | 38.51 <sup>2,111</sup>  | <0.0001 | 28.95 <sup>1,111</sup>  | <0.0001 | 0.44 <sup>2,111</sup>   | 0.646   | -                      | -       |
| <i>igf1</i> muscle        | 9.12 <sup>1,107</sup>   | 0.003   | 5.87 <sup>1,107</sup>   | 0.017   | 5.36 <sup>1,107</sup>   | 0.022   | -                      | -       |
| <i>hsp70</i> muscle       | 150.69 <sup>1,113</sup> | <0.0001 | 13.25 <sup>1,113</sup>  | 0.0004  | 142.29 <sup>1,113</sup> | <0.0001 | -                      | -       |
| <i>hsp90</i> muscle       | 221.64 <sup>1,113</sup> | <0.0001 | 1.10 <sup>1,113</sup>   | 0.297   | 0.57 <sup>1,113</sup>   | 0.452   | -                      | -       |
| <i>hsp70</i> liver        | 46.62 <sup>1,106</sup>  | <0.0001 | 9.51 <sup>1,106</sup>   | 0.003   | 41.43 <sup>1,106</sup>  | <0.0001 | -                      | -       |
| <i>hsp90</i> liver        | 379.07 <sup>1,105</sup> | <0.0001 | 22.15 <sup>1,105</sup>  | <0.0001 | 194.74 <sup>1,105</sup> | <0.0001 | -                      | -       |
| <i>hsp70</i> brain        | 22.04 <sup>2,31</sup>   | <0.0001 | 4.82 <sup>1,31</sup>    | 0.036   | 9.41 <sup>2,31</sup>    | 0.0006  | -                      | -       |
| <i>hsp90</i> brain        | 70.69 <sup>2,31</sup>   | <0.0001 | 12.52 <sup>1,31</sup>   | 0.001   | 13.82 <sup>2,31</sup>   | <0.0001 | -                      | -       |



**Table S2: Model estimates and standard errors. Population estimates are related to the intercept (lab population at 23°C)**

|                                                            | Population        |                   | Temperature $\beta^1$ |                     | Temperature $\beta^2$ |                      | Temperature $\beta^3$ |                     | Weight           |
|------------------------------------------------------------|-------------------|-------------------|-----------------------|---------------------|-----------------------|----------------------|-----------------------|---------------------|------------------|
|                                                            | Lab               | Wild              | Lab                   | Wild                | Lab                   | Wild                 | Lab                   | Wild                |                  |
| <b>Behaviour</b>                                           |                   |                   |                       |                     |                       |                      |                       |                     |                  |
| Activity (pre-cue) $\text{bl min}^{-1}$                    | 109.96 $\pm$ 4.19 | 52.17 $\pm$ 6.08  | 575.42 $\pm$ 61.57    | 35.73 $\pm$ 91.17   | -159.77 $\pm$ 63.13   | -278.02 $\pm$ 91.14  | -44.42 $\pm$ 62.05    | -127.22 $\pm$ 90.85 | -                |
| Activity (alarm cue response) $\text{bl min}^{-1}$         | -33.55 $\pm$ 5.88 | -55.48 $\pm$ 8.70 | 86.73 $\pm$ 92.08     | -3.88 $\pm$ 129.84  | 126.48 $\pm$ 94.50    | 350.248 $\pm$ 133.27 | -                     | -                   | -                |
| Bottom dwelling (alarm cue response) $\text{sec min}^{-1}$ | 12.41 $\pm$ 2.19  | 16.63 $\pm$ 3.18  | -38.52 $\pm$ 33.75    | -107.89 $\pm$ 46.18 | -58.84 $\pm$ 34.20    | -68.66 $\pm$ 47.26   | -                     | -                   | -                |
| <b>Physiology</b>                                          |                   |                   |                       |                     |                       |                      |                       |                     |                  |
| Response time ms                                           | 2.22 $\pm$ 0.09   | 0.13 $\pm$ 0.13   | -7.40 $\pm$ 0.92      | 3.31 $\pm$ 1.33     | 2.33 $\pm$ 0.89       | -1.63 $\pm$ 1.34     | -                     | -                   | -                |
| Max swim speed $\text{bl sec}^{-1}$                        | 7.82 $\pm$ 0.20   | 0.70 $\pm$ 0.28   | 19.66 $\pm$ 1.83      | 0.77 $\pm$ 2.56     | -7.07 $\pm$ 1.85      | -5.50 $\pm$ 2.56     | -6.34 $\pm$ 1.85      | 1.31 $\pm$ 2.57     | -                |
| Thermal tolerance $^{\circ}\text{C}$                       | 38.00 $\pm$ 0.18  | 0.61 $\pm$ 0.10   | 100.04 $\pm$ 1.78     | -10.27 $\pm$ 2.48   | -15.10 $\pm$ 2.06     | 3.73 $\pm$ 2.63      | -                     | -                   | 3.05 $\pm$ 1.14  |
| SMR $\text{mg h}^{-1} \text{g}^{-1}$                       | 0.50 $\pm$ 0.07   | -0.09 $\pm$ 0.03  | 2.37 $\pm$ 0.27       | -0.71 $\pm$ 0.34    | 0.39 $\pm$ 0.25       | -0.38 $\pm$ 0.32     | -                     | -                   | -1.31 $\pm$ 0.49 |
| MMR $\text{mg h}^{-1} \text{g}^{-1}$                       | 1.00 $\pm$ 0.04   | 0.26 $\pm$ 0.06   | 4.82 $\pm$ 0.43       | -1.07 $\pm$ 0.60    | -1.15 $\pm$ 0.44      | -1.05 $\pm$ 0.62     | -1.15 $\pm$ 0.43      | 1.18 $\pm$ 0.61     | -                |
| Aerobic scope $\text{mg h}^{-1} \text{g}^{-1}$             | 0.69 $\pm$ 0.05   | 0.32 $\pm$ 0.08   | 1.80 $\pm$ 0.28       | -0.45 $\pm$ 0.41    | -0.99 $\pm$ 0.27      | -0.30 $\pm$ 0.39     | -0.69 $\pm$ 0.29      | 0.59 $\pm$ 0.43     | -                |
| Growth $\% \text{ day}^{-1}$                               | 1.93 $\pm$ 0.05   | -1.03 $\pm$ 0.07  | 10.66 $\pm$ 1.29      | -3.78 $\pm$ 1.87    | -17.83 $\pm$ 1.34     | 3.96 $\pm$ 1.93      | -5.38 $\pm$ 1.33      | -0.93 $\pm$ 1.91    | -                |
| Survival proportion                                        | 3.30 $\pm$ 0.40   | -0.47 $\pm$ 0.51  | -4.03 $\pm$ 1.00      | 0.04 $\pm$ 1.37     | -9.63 $\pm$ 1.63      | 1.36 $\pm$ 2.12      | -                     | -                   | -                |
| <b>Cellular</b>                                            |                   |                   |                       |                     |                       |                      |                       |                     |                  |
| Red blood cell size FSC-A $\times 10^3$                    | 72.47 $\pm$ 0.72  | -0.11 $\pm$ 1.09  | 78.08 $\pm$ 19.71     | 25.68 $\pm$ 29.11   | 85.74 $\pm$ 21.21     | -32.23 $\pm$ 30.41   | -                     | -                   | -                |
| RNA:DNA                                                    | 2.03 $\pm$ 0.05   | -0.14 $\pm$ 0.07  | 0.002 $\pm$ 0.006     | -0.008 $\pm$ 0.009  | -                     | -                    | -                     | -                   | -                |
| <b>Genes (Relative quantity)</b>                           |                   |                   |                       |                     |                       |                      |                       |                     |                  |
| <i>ghra</i> muscle                                         | 0.57 $\pm$ 0.02   | -0.18 $\pm$ 0.03  | -1.45 $\pm$ 0.24      | 0.22 $\pm$ 0.36     | 0.88 $\pm$ 0.24       | -0.25 $\pm$ 0.35     | -                     | -                   | -                |
| <i>igf1</i> muscle                                         | 0.16 $\pm$ 0.02   | -0.08 $\pm$ 0.01  | -0.01 $\pm$ 0.02      | 0.01 $\pm$ 0.01     | -                     | -                    | -                     | -                   | -                |
| <i>hsp70</i> muscle (exp)                                  | 0.26 $\pm$ 0.06   | 0.28 $\pm$ 0.10   | 0.01 $\pm$ 0.01       | -0.01 $\pm$ 0.01    | -                     | -                    | -                     | -                   | -                |
| <i>hsp90</i> muscle (exp)                                  | 0.85 $\pm$ 0.25   | -0.30 $\pm$ 0.40  | 0.01 $\pm$ 0.01       | -0.01 $\pm$ 0.01    | -                     | -                    | -                     | -                   | -                |
| <i>hsp70</i> liver (exp)                                   | 0.31 $\pm$ 0.07   | -0.11 $\pm$ 0.12  | 0.01 $\pm$ 0.01       | -0.01 $\pm$ 0.01    | -                     | -                    | -                     | -                   | -                |
| <i>hsp90</i> liver (exp)                                   | 0.32 $\pm$ 0.47   | -0.05 $\pm$ 0.76  | 0.01 $\pm$ 0.01       | -0.01 $\pm$ 0.01    | -                     | -                    | -                     | -                   | -                |
| <i>hsp70</i> brain                                         | 0.96 $\pm$ 0.13   | -0.44 $\pm$ 0.20  | 2.61 $\pm$ 0.84       | -4.28 $\pm$ 1.21    | 5.02 $\pm$ 0.82       | -3.10 $\pm$ 1.22     | -                     | -                   | -                |
| <i>hsp90</i> brain                                         | 0.88 $\pm$ 0.08   | -0.42 $\pm$ 0.12  | 2.58 $\pm$ 0.50       | -2.04 $\pm$ 0.71    | 5.21 $\pm$ 0.48       | -3.17 $\pm$ 0.72     | -                     | -                   | -                |

**Table S3:** Primers used for gene expression analysis by qPCR

| Gene name                                                      | Abbreviation                   | Gene function                           | Forward Primer Sequence   | Reverse Primer Sequence | Accession number    |
|----------------------------------------------------------------|--------------------------------|-----------------------------------------|---------------------------|-------------------------|---------------------|
| <b>Heat shock proteins</b>                                     |                                |                                         |                           |                         |                     |
| Heat shock protein 90-alpha 1                                  | <i>hsp90</i>                   | Chaperone for damaged proteins          | tgcgcagggttttcatcatg      | accagggttttgcggatcac    | BC075757.1          |
| Heat shock protein 70                                          | <i>hsp70</i>                   | Chaperone for damaged proteins          | tcaagcgcacaacacaccatc     | atttgcaccagcaggtgttg    | AF210640            |
| <b>Growth</b>                                                  |                                |                                         |                           |                         |                     |
| Insulin like growth factor 1                                   | <i>igf1</i>                    | Growth mediator                         | acacagggggcagaaactat      | aagatggggctaaacgtcc     | NM_131825.2 (1)     |
| Growth hormone receptor $\alpha$                               | <i>ghra</i>                    | Growth hormone receptor                 | aagccagactctaccacgag      | ctaatacaccaacagcccac    | EU649774.1 (1)      |
| <b>Stress</b>                                                  |                                |                                         |                           |                         |                     |
| Mineralocorticoid receptor                                     | <i>mr</i>                      | Mineralocorticoid receptor              | cccattgaggaccaaatcac      | agtagagcattggggcgttg    | DQ017617.1 (2)      |
| Glucocorticoid receptor                                        | <i>gr</i>                      | Glucocorticoid receptor                 | acagctctccagcctcag        | ccgggttctctctgttgat     | EF567112.1 (2)      |
| <b>Immunity</b>                                                |                                |                                         |                           |                         |                     |
| Lysozyme                                                       | <i>lyz</i>                     | Immune response                         | gatttgaggattctccat        | ccgtagctctcccgtatc      | BC162644.1          |
| Interleukin 1 beta                                             | <i>il1b</i>                    | Immune response                         | tggacttcgcagcacaata       | cacttcacgctcttgatga     | NM_212844.2         |
| <b>Muscle function / Cell function</b>                         |                                |                                         |                           |                         |                     |
| Tropomyosin 1                                                  | <i>tpm1</i>                    | Muscle structure and function           | tggctcgtcacaagtttagc      | ctgccttcacagtagcacca    | NM_200934.3         |
| Myosin, heavy polypeptide 1.2                                  | <i>myhz1.2</i>                 | Muscle structure and function           | gctgaggaacaagccaactc      | agctgcctctttcccttc      | NM_001161446.1      |
| <b>Metabolism</b>                                              |                                |                                         |                           |                         |                     |
| Uncoupling protein 2                                           | <i>ucp2</i>                    | Mitochondrial uncoupling                | tggctcaaccactgatgta       | caatgggtccgatatgcgtc    | NM_131176.1 (3)     |
| Thyroid hormone receptor alpha-A                               | <i>thraa</i>                   | Thyroid hormone receptor                | ctatgaacagcacatccgacaagag | cacaccacacagcgtcatc     | NM_131396.1         |
| Sirtuin 1                                                      | <i>sirt1</i>                   | Lipid metabolism, protein deacetylation | ctggggtgtctgttctctgt      | actgtccgggtagatttcc     | XM_001334404.6      |
| Succinate dehydrogenase subunit A                              | <i>sdha</i>                    | Oxidative phosphorylation               | tggatgccgtcagccgta        | ggccaagtcttggcattgg     | BC164560.1 (4)      |
| Lactate dehydrogenase A4                                       | <i>ldha</i>                    | Anaerobic metabolism                    | tggcagtgccacaacttg        | atgttccaacagccaac       | NM_131246.1         |
| Hydroxyacyl CoA dehydrogenase $\delta^6$ fatty acyl desaturase | <i>ehhadh</i><br><i>fadsd6</i> | Lipid metabolism                        | tgggatgcactcttttcgc       | atcagcatgcggttccaac     | NM_207068.1         |
| Citrate synthase                                               | <i>cs</i>                      | Carbohydrate metabolism                 | atacctgaagccgctgctaa      | caaatgcagagcgaaaaaca    | AF309556.1          |
| NADH Dehydrogenase Fe-S protein 3 <sup>***</sup>               | <i>ndufs3</i>                  | Oxidative phosphorylation               | atgtgcagcaagttagggtg      | tgcggaactgagcattgtg     | BC165450.1          |
| Cytochrome C oxidase subunit 4i1 <sup>+</sup>                  | <i>cox4i1</i>                  | Oxidative phosphorylation               | ttggcaactacggcatttcg      | tcagctgctgcacaacttg     | NM_214701.1         |
| Elongation of very-long-chain fatty acids-like 2               | <i>elovl2</i>                  | Lipid metabolism                        | cactggcagaagttggtgaa      | gttgaggacacaccaccaga    | NM_001040362.1 (5)  |
| Carnitine palmitoyltransferase 1A                              | <i>cpt1aa</i>                  | Lipid metabolism                        | gcattgacctcagctcagc       | ctgccaacaccagcagcaac    | NM_001044854.1 (6)  |
| AMP-activated protein kinase subunit alpha-1                   | <i>prkaa1</i>                  | Cellular energy homeostasis             | cacatgaatgccaagattgc      | tcactccactgctccagatg    | NM_001110286.1      |
| Acyl-CoA oxidase 3                                             | <i>acox3</i>                   | Lipid metabolism                        | accttgggatcagtgactg       | tgtgttctgctcctcaaa      | NM_213147.1 (7)     |
| <b>Cell function</b>                                           |                                |                                         |                           |                         |                     |
| Beta 1 tubulin                                                 | <i>tubb1</i>                   | Cytoskeletal structure                  | cctgtgggaactgattgt        | tcaatgagttccttccaat     | NM_001326422.1 (8)  |
| 18s Ribosomal RNA                                              | <i>18s</i>                     | Ribosomal structure                     | tcgctagttggcatgctttatg    | cggaggttcgaagacgatca    | KY486501.1 (9)      |
| Elongation factor 1 $\alpha$ <sup>+</sup>                      | <i>ef1a</i>                    | Protein synthesis                       | tcacatgcctgcaagtttg       | tcatgtcacgcacagcaaa     | AM422110.2          |
| Hypoxia inducible factor 1 subunit alpha b <sup>***</sup>      | <i>hif1ab</i>                  | Hypoxia response transcription factor   | ccaccacccaataactcctt      | ggagtgggggcgataaaaa     | NM_001310042.1 (10) |
| Beta actin 1                                                   | <i>actb1</i>                   | Cytoskeletal structure                  | ggcatcacaccttcaaatga      | taocaccagaagcgtacagaga  | NM_131031.2         |
| <b>Cell protection</b>                                         |                                |                                         |                           |                         |                     |
| Superoxide dismutase 2, mitochondrial <sup>+</sup>             | <i>sod2</i>                    | Antioxidant                             | attgaggattgcagcgttg       | ttcttgcagctggaaacg      | NM_199976.1         |
| Superoxide dismutase 1, soluble <sup>+</sup>                   | <i>sod1</i>                    | Antioxidant                             | acaacacaaagcgtgcatc       | tttgcaacaccactggcatc    | NM_131294.1         |
| Glutathione-S-transferase Alpha 1                              | <i>gsta.1</i>                  | Detoxifying enzyme and antioxidant      | ccccaaaatacagcgtttc       | gcccggctggaggaaact      | NM_213394.1         |
| Glutathione peroxidase 1a                                      | <i>gpx1a</i>                   | Antioxidant                             | agatgcttctctgcacag        | aaggagaagcttctcagcc     | NM_001007281.2      |
| Catalase <sup>+</sup>                                          | <i>cat</i>                     | Antioxidant                             | aaaatatggccggcactctg      | acagccatcaggtttgac      | AJ007505.1          |
| <b>ER stress</b>                                               |                                |                                         |                           |                         |                     |
| X-box binding protein 1                                        | <i>xbp1</i>                    | ER stress mediator                      | gggttgatacttggaata        | agggccagggctgtgagta     | NM_131874.1 (11)    |
| X-box binding protein 1 (spliced form)                         | <i>xbp-1s</i>                  | ER stress mediator                      | tgttgcgagacaagcaga        | cctgcacctgctgcggact     | AF420256 (12)       |
| Stress-associated endoplasmic reticulum protein 1              | <i>serp1</i>                   | ER stress mediator                      | ccgaaatcacagctcaactg      | catgcgaatcctctgttgg     | NM_200034.1         |

|                                                                                 |                |                    |                       |                       |                     |
|---------------------------------------------------------------------------------|----------------|--------------------|-----------------------|-----------------------|---------------------|
| Eukaryotic translation initiation factor 2-alpha kinase 3 (homolog of PERK)     | <i>eif2ak3</i> | ER stress mediator | tttgcgcagaacggacatg   | atcttcaccgggacactcac  | XM_005156585.4 (12) |
| Endoplasmic to nucleus signalling 1 (homolog of IRE1)                           | <i>ern1</i>    | ER stress mediator | ccagtggtgtaagaggatt   | agttgcacagttctatggcga | NM_001020530 (12)   |
| Eukaryotic translation initiation factor 2 subunit 1 alpha a (homolog of eIF2a) | <i>eif2s1a</i> | ER stress mediator | ccaaagatgagcagctggaga | atccgacacagcctgctaaa  | NM_199569.1(12)     |
| DNA-damage inducible transcript 3 (homolog of CHOP)                             | <i>ddit3</i>   | ER stress mediator | gagttggaggcgtggtatga  | cctggggcgtggtgaa      | NM_001082825 (12)   |
| Heat shock protein 5 (homolog of GRP78)                                         | <i>bip</i>     | ER stress mediator | cgaagaagccagatcgtatga | acggctctttccgtgaaag   | NM_213058 (13)      |
| Activating transcription factor 6                                               | <i>atf6</i>    | ER stress mediator | ctgtggtgaaacctccacct  | catggtgaccacaggagatg  | NM_001110519 (12)   |

#### Apoptosis

|                            |               |                        |                    |                     |                |
|----------------------------|---------------|------------------------|--------------------|---------------------|----------------|
| Caspase 3                  | <i>casp3b</i> | Pro apoptotic mediator | accgcttgcacggaatc  | tgtttgtgactggcaccac | NM_001048066.2 |
| BCL2 Apoptosis regulator A | <i>bcl2a</i>  | Pro apoptotic mediator | ttgactgtgatcctgcac | tgacagtgttgtgtgctg  | NM_001030253.2 |

\* Used as housekeeping gene in muscle; + used as house keeping gene in liver; ¥ used as housekeeping gene in brain

**Table S4:** Statistical output from ANOVA's comparing whether acclimation temperature (T), population (P; wild or lab) and the interaction between them (T×P) differs in a range of traits (supplementary data traits only)

|                                          | Temperature (T)         |              | Population (P)          |              | Interaction (T x P)   |              |
|------------------------------------------|-------------------------|--------------|-------------------------|--------------|-----------------------|--------------|
|                                          | F-value <sup>df</sup>   | p-value      | F-value <sup>df</sup>   | p-value      | F-value <sup>df</sup> | p-value      |
| <b>Behaviour</b>                         |                         |              |                         |              |                       |              |
| Time freezing (alarm cue response)       | 17.62 <sup>3,173</sup>  | <0.0001      | 28.36 <sup>1,173</sup>  | <0.0001      | 1.37 <sup>3,173</sup> | 0.254        |
| Time at surface (alarm cue response)     | 1.01 <sup>1,177</sup>   | 0.317        | 0.65 <sup>1,177</sup>   | 0.420        | 8.77 <sup>1,177</sup> | <b>0.003</b> |
| Distance to surface (pre-cue)            | 4.86 <sup>1,209</sup>   | <b>0.029</b> | 1.09 <sup>1,209</sup>   | 0.299        | 0.44 <sup>1,209</sup> | 0.851        |
| Distance to surface (post-cue)           | 10.70 <sup>2,178</sup>  | <0.0001      | 5.86 <sup>1,178</sup>   | <b>0.017</b> | 2.56 <sup>2,178</sup> | 0.080        |
| Distance to surface (alarm cue response) | 11.22 <sup>2,175</sup>  | <0.0001      | 7.90 <sup>1,175</sup>   | <b>0.006</b> | 3.31 <sup>2,175</sup> | <b>0.039</b> |
| Activity (post-cue)                      | 50.40 <sup>3,164</sup>  | <0.0001      | 1.93 <sup>1,164</sup>   | 0.167        | 0.49 <sup>3,164</sup> | 0.690        |
| <b>Physiology</b>                        |                         |              |                         |              |                       |              |
| Growth % length day <sup>-1</sup>        | 300.29 <sup>3,520</sup> | <0.0001      | 340.52 <sup>1,520</sup> | <0.0001      | 7.48 <sup>3,520</sup> | <0.0001      |
| Condition                                | 17.81 <sup>2,522</sup>  | <0.0001      | 36.47 <sup>1,522</sup>  | <0.0001      | 4.11 <sup>2,522</sup> | <b>0.017</b> |
| Max swim speed (indiv)                   | 12.75 <sup>2,95</sup>   | <0.0001      | 0.15 <sup>1,95</sup>    | 0.699        | 3.24 <sup>2,95</sup>  | <b>0.044</b> |
| <b>Genes</b>                             |                         |              |                         |              |                       |              |
| <i>prkaa1</i> muscle                     | 9.90 <sup>1,106</sup>   | <b>0.002</b> | 15.68 <sup>1,106</sup>  | <0.0001      | 0.44 <sup>2,111</sup> | 0.646        |
| <i>sdha</i> muscle                       | 18.45 <sup>1,101</sup>  | <0.0001      | 9.95 <sup>1,101</sup>   | <b>0.002</b> | 2.73 <sup>1,101</sup> | 0.101        |
| <i>thraa</i> muscle                      | 7.40 <sup>2,102</sup>   | <b>0.001</b> | 25.33 <sup>1,102</sup>  | <0.0001      | 0.47 <sup>2,102</sup> | 0.625        |

**Table S5:** Statistical output from Chi-squared tests for one physiological and six behavioural traits. The test sequentially adds acclimation temperature (T), population (P; wild or lab) and the interaction between them (T×P) into the model to compare whether there is a significant difference from the NULL model.

|                            | NULL                 | Temperature<br>(T)                 |                   | Population<br>(P)                  |               | Interaction<br>(T x P)             |              |
|----------------------------|----------------------|------------------------------------|-------------------|------------------------------------|---------------|------------------------------------|--------------|
|                            | Residual<br>Deviance | Residual<br>Deviance <sup>df</sup> | p-value           | Residual<br>Deviance <sup>df</sup> | p-value       | Residual<br>Deviance <sup>df</sup> | p-value      |
| <b>Behaviour</b>           |                      |                                    |                   |                                    |               |                                    |              |
| Time freezing (pre-cue)    | 48.192               | 24.99 <sup>1,211</sup>             | <b>&lt;0.0001</b> | 22.60 <sup>1,210</sup>             | 0.122         | 22.53 <sup>1,209</sup>             | 0.791        |
| Time freezing (post-cue)   | 173.94               | 138.30 <sup>1,182</sup>            | <b>&lt;0.0001</b> | 127.79 <sup>1,181</sup>            | <b>0.001</b>  | 126.84 <sup>1,180</sup>            | 0.328        |
| Time at surface (pre-cue)  | 39.53                | 39.52 <sup>1,211</sup>             | 0.948             | 39.52 <sup>1,210</sup>             | 0.999         | 39.52 <sup>1,209</sup>             | 0.946        |
| Time at surface (post-cue) | 50.86                | 50.18 <sup>1,182</sup>             | 0.409             | 49.71 <sup>1,181</sup>             | 0.494         | 43.24 <sup>1,180</sup>             | <b>0.011</b> |
| Bottom-dwelling (pre-cue)  | 39.82                | 36.68 <sup>1,211</sup>             | 0.076             | 35.70 <sup>1,210</sup>             | 0.322         | 35.70 <sup>1,209</sup>             | 0.999        |
| Bottom-dwelling (post-cue) | 162.86               | 150.21 <sup>1,182</sup>            | <b>0.0004</b>     | 138.32 <sup>1,181</sup>            | <b>0.0006</b> | 136.35 <sup>1,180</sup>            | 0.160        |
| <b>Physiology</b>          |                      |                                    |                   |                                    |               |                                    |              |
| Survival                   | 247.07               | 78.225 <sup>2,27</sup>             | <b>&lt;0.001</b>  | 77.71 <sup>1,26</sup>              | 0.474         | 77.30 <sup>2,24</sup>              | 0.812        |

**Table S6: Model estimates and standard errors for extended data phenotypes.** Population estimates are related to the intercept (lab population at 23°C) Estimates from proportion data are derived from glm models with a binomial error structure and therefore need to be back-transformed to obtain exact proportions.

|                                                            | Population    |               | Temperature $\beta^1$ |                 | Temperature $\beta^2$ |                | Temperature $\beta^3$ |                 |
|------------------------------------------------------------|---------------|---------------|-----------------------|-----------------|-----------------------|----------------|-----------------------|-----------------|
|                                                            | Lab           | Wild          | Lab                   | Wild            | Lab                   | Wild           | Lab                   | Wild            |
| <b>Behaviour</b>                                           |               |               |                       |                 |                       |                |                       |                 |
| Time freezing (pre-cue) proportion                         | -3.38 ± 0.74  | -0.64 ± 1.20  | -0.23 ± 0.08          | 0.03 ± 0.13     | -                     | -              | -                     | -               |
| Time freezing (post-cue) proportion                        | -1.27 ± 0.30  | 1.22 ± 0.38   | -0.16 ± 0.04          | 0.05 ± 0.05     | -                     | -              | -                     | -               |
| Time freezing (alarm cue response) sec min <sup>-1</sup>   | 11.84 ± 2.09  | 15.39 ± 3.01  | -94.38 ± 32.22        | -65.96 ± 43.88  | -56.76 ± 32.50        | -46.27 ± 44.73 | 89.94 ± 30.53         | -49.911 ± 42.90 |
| Time at surface (pre-cue) proportion                       | -1.23 ± 0.23  | -0.01 ± 0.33  | -0.01 ± 0.03          | 0.01 ± 0.04     | -                     | -              | -                     | -               |
| Time at surface (post-cue) proportion                      | 3.27 ± 0.97   | 0.61 ± 1.40   | -23.50 ± 13.87        | 65.34 ± 19.91   | 45.05 ± 13.81         | 1.84 ± 19.02   | -                     | -               |
| Time at surface (alarm cue response) sec min <sup>-1</sup> | -10.99 ± 1.15 | 1.33 ± 1.67   | -0.22 ± 0.15          | 0.60 ± 0.20     | -                     | -              | -                     | -               |
| Distance to surface (pre-cue) cm                           | 8.66 ± 0.40   | -0.60 ± 0.57  | -0.08 ± 0.05          | 0.01 ± 0.07     | -                     | -              | -                     | -               |
| Distance to surface (post-cue) cm                          | 15.63 ± 0.65  | 2.24 ± 0.94   | -3.35 ± 9.31          | -27.63 ± 12.69  | -19.40 ± 9.27         | -8.23 ± 12.77  | -                     | -               |
| Distance to surface (alarm cue response) cm                | 7.23 ± 0.62   | 2.44 ± 0.90   | 3.22 ± 9.54           | -31.22 ± 13.05  | -21.92 ± 9.67         | -16.38 ± 13.36 | -                     | -               |
| Activity (post-cue) bi min <sup>-1</sup>                   | 77.55 ± 5.20  | -9.95 ± 7.59  | 630.68 ± 76.60        | -40.46 ± 106.06 | -16.62 ± 76.56        | 71.78 ± 106.82 | -183.83 ± 74.51       | 97.09 ± 106.15  |
| Bottom-dwelling (pre-cue) proportion                       | -2.14 ± 0.32  | -0.48 ± 0.51  | -0.05 ± 0.04          | -0.01 ± 0.06    | -                     | -              | -                     | -               |
| Bottom-dwelling (post-cue) proportion                      | -0.82 ± 0.23  | 1.07 ± 0.32   | -0.04 ± 0.03          | -0.06 ± 0.04    | -                     | -              | -                     | -               |
| <b>Physiology</b>                                          |               |               |                       |                 |                       |                |                       |                 |
| Growth % length day <sup>-1</sup>                          | 0.56 ± 0.01   | -0.26 ± 0.02  | 2.97 ± 0.30           | -0.59 ± 0.44    | -5.08 ± 0.31          | 1.47 ± 0.45    | -1.70 ± 0.31          | -0.51 ± 0.45    |
| Condition                                                  | 0.18 ± 0.001  | -0.01 ± 0.002 | 0.07 ± 0.03           | -0.06 ± 0.05    | -0.18 ± 0.04          | 0.11 ± 0.05    | -                     | -               |
| Max swim speed (indiv) bi sec <sup>-1</sup>                | 14.05 ± 0.69  | 0.83 ± 1.00   | 19.31 ± 18.19         | 66.79 ± 26.68   | -47.90 ± 19.34        | 26.37 ± 28.19  | -                     | -               |
| <b>Genes (Relative quantity)</b>                           |               |               |                       |                 |                       |                |                       |                 |
| <i>prkaa1</i> muscle                                       | 1.99 ± 0.15   | -0.95 ± 0.24  | -0.05 ± 0.02          | 0.01 ± 0.03     | -                     | -              | -                     | -               |
| <i>sdha</i> muscle                                         | 36.81 ± 2.96  | -15.84 ± 4.99 | -1.71 ± 0.39          | 0.99 ± 0.60     | -                     | -              | -                     | -               |
| <i>thraa</i> muscle                                        | 71.64 ± 4.53  | -37.24 ± 7.46 | -27.90 ± 48.70        | 9.27 ± 75.49    | 193.75 ± 50.50        | -72.34 ± 75.21 | -                     | -               |

**Table S7:** Optimal temperatures ( $T_{opt}$ ) and thermal performance breadths (TPB; 80% performance) of lab and wild populations of zebrafish for five phenotypes. The difference in thermal performance breadth is calculated as:  $TPB_{Wild} - TPB_{Lab}$ . Optimal values are calculated from the best fitted model (second or third order polynomial)

| Phenotype                                                         | Value <sub>opt</sub> |       | Value <sub>80%</sub> |      | T <sub>opt</sub> (°C) |       | Lower T <sub>80%</sub> (°C) |       | Upper T <sub>80%</sub> (°C) |       | TPB (°C) |       | Difference TPB (°C) |
|-------------------------------------------------------------------|----------------------|-------|----------------------|------|-----------------------|-------|-----------------------------|-------|-----------------------------|-------|----------|-------|---------------------|
|                                                                   | Lab                  | Wild  | Lab                  | Wild | Lab                   | Wild  | Lab                         | Wild  | Lab                         | Wild  | Lab      | Wild  |                     |
| Maximum swim speed (U <sub>crit</sub> group; bl s <sup>-1</sup> ) | 10.7                 | 11.52 | 8.56                 | 9.22 | 30.34                 | 29.13 | 22.93                       | 21.43 | 36.20                       | 35.41 | 13.27    | 13.98 | 0.71                |
| Growth (% weight gain day <sup>-1</sup> )                         | 2.98                 | 1.78  | 2.38                 | 1.42 | 28.02                 | 28.30 | 21.34                       | 22.98 | 33.65                       | 32.78 | 12.31    | 9.80  | -2.51               |
| Aerobic scope (AS, mg h <sup>-1</sup> g <sup>-1</sup> )           | 1.19                 | 1.36  | 0.95                 | 1.09 | 29.31                 | 27.08 | 23.70                       | 19.24 | 33.98                       | 34.36 | 10.28    | 15.12 | 4.84                |
| Maximum metabolic rate (MMR, mg h <sup>-1</sup> g <sup>-1</sup> ) | 1.66                 | 1.68  | 1.33                 | 1.35 | 31.34                 | 29.11 | 24.90                       | 20.01 | 36.67                       | 38.39 | 11.77    | 18.38 | 6.61                |
| Growth (% length gain day <sup>-1</sup> )                         | 0.86                 | 0.56  | 0.69                 | 0.45 | 28.11                 | 28.97 | 24.48                       | 28.66 | 33.64                       | 33.38 | 9.16     | 4.72  | 4.44                |

## Supplementary References

1. J. Tian, K. Wang, X. Wang, H. Wen, H. Zhou, C. Liu, K. Mai, G. He, Soybean saponin modulates nutrient sensing pathways and metabolism in zebrafish. *Gen. Comp. Endocrinol.* 257, 246–254 (2018).
2. C. Best, M. M. Vijayan, Cortisol elevation post-hatch affects behavioural performance in zebrafish larvae. *Gen. Comp. Endocrinol.* 257, 220–226 (2018).
3. V. Stancová, A. Ziková, Z. Svobodová, W. Kloas, Effects of the non-steroidal anti-inflammatory drug(NSAID) naproxen on gene expression of antioxidant enzymes in zebrafish (*Danio rerio*). *Environ. Toxicol. Pharmacol.* 40, 343–348 (2015).
4. Y. Yang, W. Liu, D. Li, L. Qian, B. Fu, C. Wang, Altered glycometabolism in zebrafish exposed to thifluzamide. *Chemosphere.* 183, 89–96 (2017).
5. O. Monroig, J. Rotllant, E. Sánchez, J. M. Cerdá-Reverter, D. R. Tocher, Expression of long-chain polyunsaturated fatty acid (LC-PUFA) biosynthesis genes during zebrafish *Danio rerio* early embryogenesis. *Biochim. Biophys. Acta* 1791, 1093–1101 (2009).
6. G. M. Her, C.-C. Hsu, J.-R. Hong, C.-Y. Lai, M.-C. Hsu, H.-W. Pang, S.-K. Chan, W.-Y. Pai, Overexpression of gankyrin induces liver steatosis in zebrafish (*Danio rerio*). *Biochim. Biophys. Acta.* 1811, 536–548 (2011).
7. Y.-S. Shieh, Y.-S. Chang, J.-R. Hong, L.-J. Chen, L.-K. Jou, C.-C. Hsu, G. M. Her, Increase of hepatic fat accumulation by liver specific expression of Hepatitis B virus X protein in zebrafish. *Biochim. Biophys. Acta.* 1801, 721–730 (2010).
8. C. C. Lazado, S. Nayak, I. Khozin-Goldberg, D. Zilberg, The gut mucosal barrier of zebrafish (*Danio rerio*) responds to the time-restricted delivery of *Lobosphaera incisa*-enriched diets. *Fish Shellfish Immunol.* 89, 368–377 (2019).
9. Y. Yun, Y. Zhang, G. Li, S. Chen, N. Sang, Embryonic exposure to oxy-polycyclic aromatic hydrocarbon interfere with pancreatic  $\beta$ -cell development in zebrafish via altering DNA methylation and gene expression. *Sci. Total Environ.* 660, 1602–1609 (2019).
10. D. Boyle, G. G. Goss, Effects of silver nanoparticles in early life-stage zebrafish are associated with particle dissolution and the toxicity of soluble silver. *NanoImpact.* 12, 1–8 (2018).
11. Y. Yang, F. Dong, X. Liu, J. Xu, X. Wu, W. Liu, Y. Zheng, Crosstalk of oxidative damage, apoptosis, and autophagy under endoplasmic reticulum (ER) stress involved in thifluzamide-induced liver damage in zebrafish (*Danio rerio*). *Environ. Pollut.* 243, 1904–1911 (2018).
12. M. Qi, Y. Dang, Q. Xu, L. Yu, C. Liu, Y. Yuan, J. Wang, Microcystin-LR induced developmental toxicity and apoptosis in zebrafish (*Danio rerio*) larvae by activation of ER stress response. *Chemosphere.* 157, 166–173 (2016).
13. V. Christen, M. Capelle, K. Fent, Silver nanoparticles induce endoplasmic reticulum stress response in zebrafish. *Toxicol. Appl. Pharmacol.* 272, 519–528 (2013).
